# Supplementary material for: Polyphenol-rich Trapa quadrispinosa pericarp extract ameliorates high-fat diet induced non-alcoholic fatty liver disease by regulating lipid metabolism and insulin resistance in mice
Source: PeerJ. 2019 Nov 29;7:e8165. doi: 10.7717/peerj.8165 (PMC6886490; doi:10.7717/peerj.8165)
Supplement: Supplemental Information 1 [file peerj-07-8165-s001.xlsx]

## Sheet: Sheet1
TG
CON	HFD	HFD+TQPE 15	HFD+TQPE 30
1.80527	5.01824	3.6289	4.05759
2.29498	4.75376	2.87417	3.06452
1.93154	5.10526	3.47745	2.76251
2.26939	4.98241	4.13779	1.92623
2.34105	5.82873	4.71281	3.91256
2.32569	4.85627	4.5746	2.82223
2.42634	4.98692	3.54911	2.68308
1.76524	5.25169	3.04234	2.6244
2.34835	5.18567	3.13239	3.04948
2.17549	5.48929	4.41743	2.39211
TC
CON	HFD	HFD+TQPE 15	HFD+TQPE 30
4.11397	10.2996	8.54621	8.1787
3.79959	10.9107	9.08197	5.57957
3.14428	9.78599	5.96036	7.65622
2.79448	11.8626	6.98319	8.53735
3.17527	10.4413	6.72637	8.07686
3.79959	10.5786	10.5476	3.17084
3.2594	11.5305	7.38169	6.33673
3.61805	10.6937	8.77373	8.48422
3.24215	12.1372	7.20867	6.828
3.6544	11.8493	7.30018	7.31365
HDL
CON	HFD	HFD+TQPE 15	HFD+TQPE 30
3.04161	1.95866	3.21837	3.37482
2.52959	2.24717	2.61087	3.05989
2.54382	2.37924	3.20822	3.07005
2.30203	2.06838	2.45239	2.79982
2.41378	2.0765	3.20822	2.28375
3.03145	2.0826	2.95424	2.7023
2.8303	2.35486	2.94002	3.88074
2.78798	2.11625	2.72465	3.50283
2.98065	2.45318	2.18847	3.29364
2.76952	1.80438	2.34252	3.32353
LDL
CON	HFD	HFD+TQPE 15	HFD+TQPE 30
0.464986	1.07149	1.58242	0.790292
0.529312	1.814	1.37106	1.20014
0.547691	1.69821	1.71843	1.25895
0.744345	1.4648	1.05679	1.26631
0.896937	2.02352	1.65594	0.940999
0.562394	1.79929	1.76989	0.972243
0.589962	1.47227	1.58343	0.988784
0.681857	1.85268	1.34166	0.924458
0.484242	1.33074	1.95199	0.865646
0.553132	1.91194	1.26389	1.13414
INS
CON	HFD	HFD+TQPE 15	HFD+TQPE 30
7.05637	9.45672	8.16194	8.67453
6.37666	8.98676	8.42375	7.88854
6.87777	9.96328	7.99682	7.62121
7.70119	9.72049	8.85191	8.49255
7.23859	10.7115	8.17437	7.10484
7.01499	11.7028	8.51898	8.28864
7.78353	10.7368	8.86573	7.75266
6.72243	9.66654	7.44093	8.39637
6.89036	10.9865	9.03089	7.87056
6.78567	8.9863	8.08787	7.66047
HOMA
CON	HFD	HFD+TQPE 15	HFD+TQPE 30
1.81898	5.54794	2.06769	3.00717
1.44538	3.87429	2.92023	2.13867
1.6201	4.33956	2.23911	2.20168
2.08788	3.58578	3.22603	3.09506
1.96246	4.52264	3.59672	2.43144
1.43417	5.56531	2.99111	2.32082
1.90335	4.89289	3.10333	2.54976
1.62715	4.2421	2.53606	2.86643
2.03388	4.62614	2.76527	2.26533
1.47521	4.36756	3.18091	2.67121
AST
CON	HFD	HFD+TQPE 15	HFD+TQPE 30
28.5868	55.5284	34.2294	38.7432
33.9137	47.5266	43.259	39.6008
28.5234	65.0418	37.5882	35.1147
28.9473	58.0672	42.5409	44.4343
30.2754	59.3177	37.7524	39.0282
28.9261	63.962	39.9845	39.553
32.1459	61.3672	38.4354	42.2453
26.8212	56.2206	43.6076	39.2425
30.4081	55.4646	41.6173	36.2513
28.5158	62.3471	37.1524	38.4524
ALT
CON	HFD	HFD+TQPE 15	HFD+TQPE 30
54.2578	92.1641	77.9688	85.6327
59.4648	98.1188	73.9891	90.1133
60.2219	114.091	68.5344	77.4551
63.3216	106.954	78.8577	86.4922
64.7935	125.579	82.6386	78.4119
67.5339	111.965	86.9462	55.6639
65.3212	113.28	74.269	68.5669
56.4161	104.741	75.6128	76.836
62.8132	115.788	80.6599	70.1852
59.1889	100.269	73.2752	83.2348
weight
CON	HFD	HFD+TQPE 15	HFD+TQPE 30
34	44	40	40
34	43	36	33
35	44	42	41
36	43	41	43
34	46	43	39
34	43	42	38
35	48	43	38
32	44	38	36
33	45	38	37
33	46	37	37
liver/weight
CON	HFD	HFD+TQPE 15	HFD+TQPE 30
4.70588	5.90909	5.25	5
5	6.04651	5.55556	4.84849
5.14286	5.45455	4.7619	4.63415
4.72222	6.04651	5.12195	4.88372
4.70588	5.43478	4.65116	5.12821
4.41176	6.27907	5.2381	5
4.57143	5	4.65116	5
5.3125	6.36364	5.52632	5.27778
4.84849	5.11111	5.52632	5.13514
4.68116	5.64514	5.32332	4.87176
SOD
CON	HFD	HFD+TQPE 15	HFD+TQPE 30
27.4428	23.688	25.7796	28.602
28.3752	24.3432	26.3844	25.3512
27.1152	22.806	25.2252	27.09
27.5184	24.2676	27.0648	28.9044
27.5184	23.9904	24.7212	26.8632
28.1232	22.6548	25.956	29.358
31.248	22.9824	25.7796	28.1232
33.0624	20.8404	25.2756	28.4004
30.4505	25.4472	26.3131	27.8871
26.1143	21.6478	23.4751	26.4793
Concentration of five polyphenols in TPQE by HPLC-DAD analysis (mg/g)
Gallic acid	28.1427	26.5178	28.3297
1,2,3-tri-O-galloyl-β-D-glucopyranose	19.8792	19.8198	19.9681
1,2,3-tetra-O-galloyl-4,6-O-hexahydroxydiphenoyl-β-D- glucopyranoside	182.031	179.788	184.551
1,2,3,6-tetra-O-galloyl-β-D-glucopyranose	456.987	470.27	458.471
1,2,3,4,6-penta-O-hexahydroxydiphenoyl-β-D-glucopyranoside	4.14149	3.98551	3.98368
